# Supplementary material for: Outpatient Treatment with AZD7442 (Tixagevimab/Cilgavimab) Prevented COVID-19 Hospitalizations over 6 Months and Reduced Symptom Progression in the TACKLE Randomized Trial
Source: PubMed Central journal article supplement — Infect Dis Ther. 2023 Sep 26;12(9):2269–87. doi: 10.1007/s40121-023-00861-7 (PMC10581960; doi:10.1007/s40121-023-00861-7), 2023-09-26
Supplement: 40121_2023_861_MOESM1_ESM.pdf [file 40121_2023_861_MOESM1_ESM.pdf]

---

**Supplementary Appendix to:**

**Outpatient Treatment with the SARS-CoV-2–Neutralizing  
Antibody Combination AZD7442 (Tixagevimab/Cilgavimab)  
Prevented COVID-19 Hospitalizations Over 6 Months and  
Reduced Symptom Progression in the  
Phase 3 TACKLE Trial**

**F.D. Richard Hobbs,<sup>1</sup> Hugh Montgomery,<sup>2</sup> Francisco Padilla,<sup>3</sup> Jesus Abraham Simón-Campos,<sup>4</sup> Kenneth Kim,<sup>5</sup> Douglas Arbetter,<sup>6</sup> Kelly W. Padilla,<sup>7</sup> Venkatesh Pilla Reddy,<sup>8</sup> Seth Seegobin,<sup>9</sup> Katie Streicher,<sup>10</sup> Alison Templeton,<sup>9</sup> Rolando M. Viani,<sup>11</sup> Eva Johnsson,<sup>12</sup> Gavin C.K.W. Koh,<sup>13</sup> Mark T. Esser,<sup>14</sup>**

*<sup>1</sup>Nuffield Department of Primary Care Health Sciences, University of Oxford, Oxford, UK; <sup>2</sup>Department of Medicine, University College London, London, UK; <sup>3</sup>Centro de Investigación en Cardiología y Metabolismo, Guadalajara, Jalisco, Mexico; <sup>4</sup>Köhler & Milstein Research/UADY School of Medicine, Mérida, Yucatán, Mexico; <sup>5</sup>ARK Clinical Research, Long Beach, CA, USA; <sup>6</sup>Biometrics, Vaccines & Immune Therapies, BioPharmaceuticals R&D, AstraZeneca, Boston, MA, USA; <sup>7</sup>Clinical Development, Late-stage Development, Vaccines & Immune Therapies, BioPharmaceuticals R&D, AstraZeneca, Durham, NC, USA; <sup>8</sup>Clinical Pharmacology and Safety Sciences, BioPharmaceuticals R&D, AstraZeneca, Cambridge, UK; <sup>9</sup>Biometrics, Vaccines & Immune Therapies, BioPharmaceuticals R&D, AstraZeneca, Cambridge, UK; <sup>10</sup>Translational Medicine, Vaccines & Immune Therapies, BioPharmaceuticals R&D, AstraZeneca, Gaithersburg, MD, USA; <sup>11</sup>Late-stage*

---

*Development, Vaccines & Immune Therapies, BioPharmaceuticals R&D, AstraZeneca, Gaithersburg, MD, USA; <sup>12</sup>Vaccines & Immune Therapies, BioPharmaceuticals R&D, AstraZeneca, Gothenburg, Sweden; <sup>13</sup>Clinical Development, Late-stage development, Vaccines & Immune Therapies, BioPharmaceuticals R&D, AstraZeneca, Cambridge, UK; <sup>14</sup>Vaccines & Immune Therapies, BioPharmaceuticals R&D, AstraZeneca, Gaithersburg, MD, USA*

Correspondence to: Mark T. Esser, Vaccines & Immune Therapies,  
BioPharmaceuticals R&D, AstraZeneca, Gaithersburg, MD 20878, USA;  
email: [mark.esser@astrazeneca.com](mailto:mark.esser@astrazeneca.com).

---

## **Supplementary Appendix**

### **Definition of Serious Adverse Events**

A serious adverse event (SAE) is an AE occurring during any study phase (i.e., run-in, treatment, washout, follow-up) that fulfils one or more of the following criteria:

- results in death
- immediately life-threatening
- requires inpatient hospitalization or prolongation of existing hospitalization
- results in persistent or significant disability or incapacity
- a congenital abnormality or birth defect
- an important medical event that may jeopardize the participant or may require medical treatment to prevent one of the outcomes listed above

### **Adverse Event Severity Rating Scale**

- Grade 1: An event of mild intensity that is usually transient and may require only minimal treatment or therapeutic intervention. The event does not generally interfere with usual activities of daily living.
- Grade 2: An event of moderate intensity that is usually alleviated with additional, specific therapeutic intervention. The event interferes with usual activities of daily living, causing discomfort, but poses no significant or permanent risk of harm to the participant.
- Grade 3: A severe event that requires intensive therapeutic intervention. The

---

event interrupts usual activities of daily living or significantly affects the clinical status of the participant.

- Grade 4: An event, and/or its immediate sequelae, that is associated with an imminent risk of death.
- Grade 5: Death as result of an event.

It is important to distinguish between serious and severe AEs. Severity is a measure of intensity whereas seriousness is defined by the criteria mentioned in the section above. An AE of severe intensity need not necessarily be considered serious. For example, nausea that persists for several hours may be considered severe nausea, but is not an SAE unless it meets the criteria for an SAE. Conversely, a stroke that results in only a limited degree of disability may be considered a mild stroke but would be an SAE when it satisfies the SAE criteria.

**Figure S1. Participant disposition (CONSORT flow diagram).**

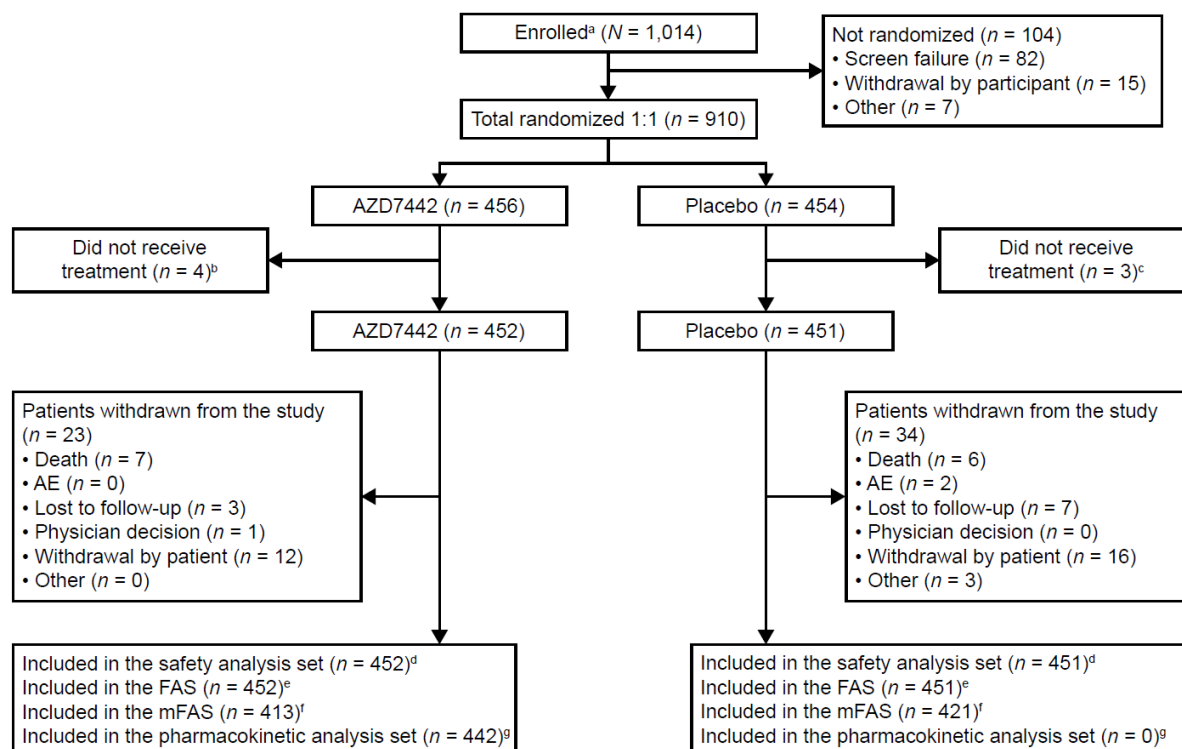

Data cut-off, January 14, 2022.

<sup>a</sup>Informed consent received.

<sup>b</sup>Due to physician decision ( $n = 1$ ) or withdrawal by participant ( $n = 3$ ).

<sup>c</sup>Due to withdrawal by participant ( $n = 1$ ) or other reason ( $n = 2$ ).

<sup>d</sup>Comprised all participants who received study drug (erroneously treated participants were analyzed according to the treatment they actually received).

<sup>e</sup>Comprised all randomized participants who received study drug.

<sup>f</sup>Comprised all participants in the FAS who received study drug  $\leq 7$  days from symptom onset and were not hospitalized at baseline ( $\leq$  Day 1) for isolation purposes.

<sup>g</sup>Comprised all participants who received AZD7442 with  $\geq 1$  quantifiable serum pharmacokinetic observation post-dose.

AE adverse event, FAS full analysis set, mFAS modified FAS.

**Figure S2. Proportion of participants at each symptom severity level by study day for (a) chills, (b) body aches, (c) diarrhea, (d) fatigue, (e) headaches, (f) nausea, and (g) runny nose (mFAS).**

**(a) Chills**

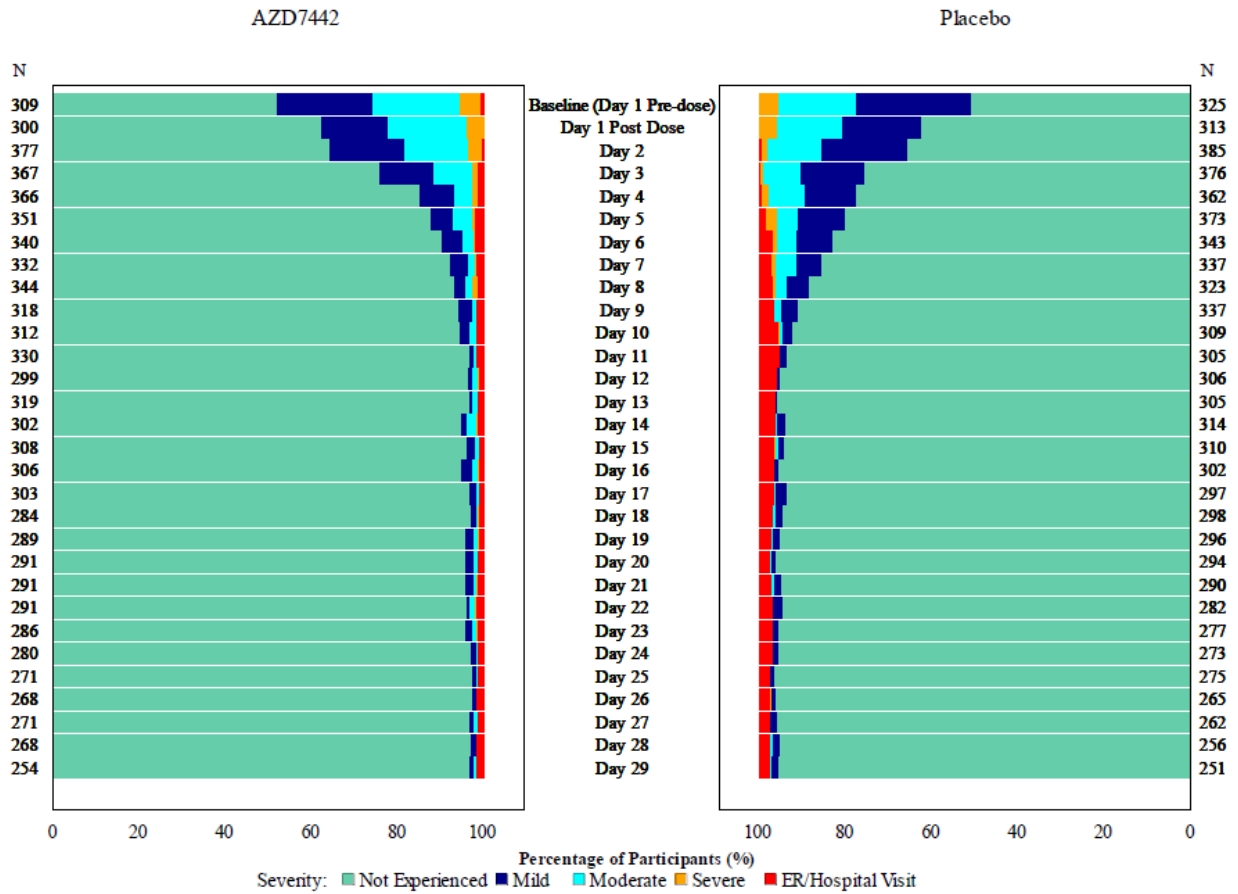

**(b) Body aches**

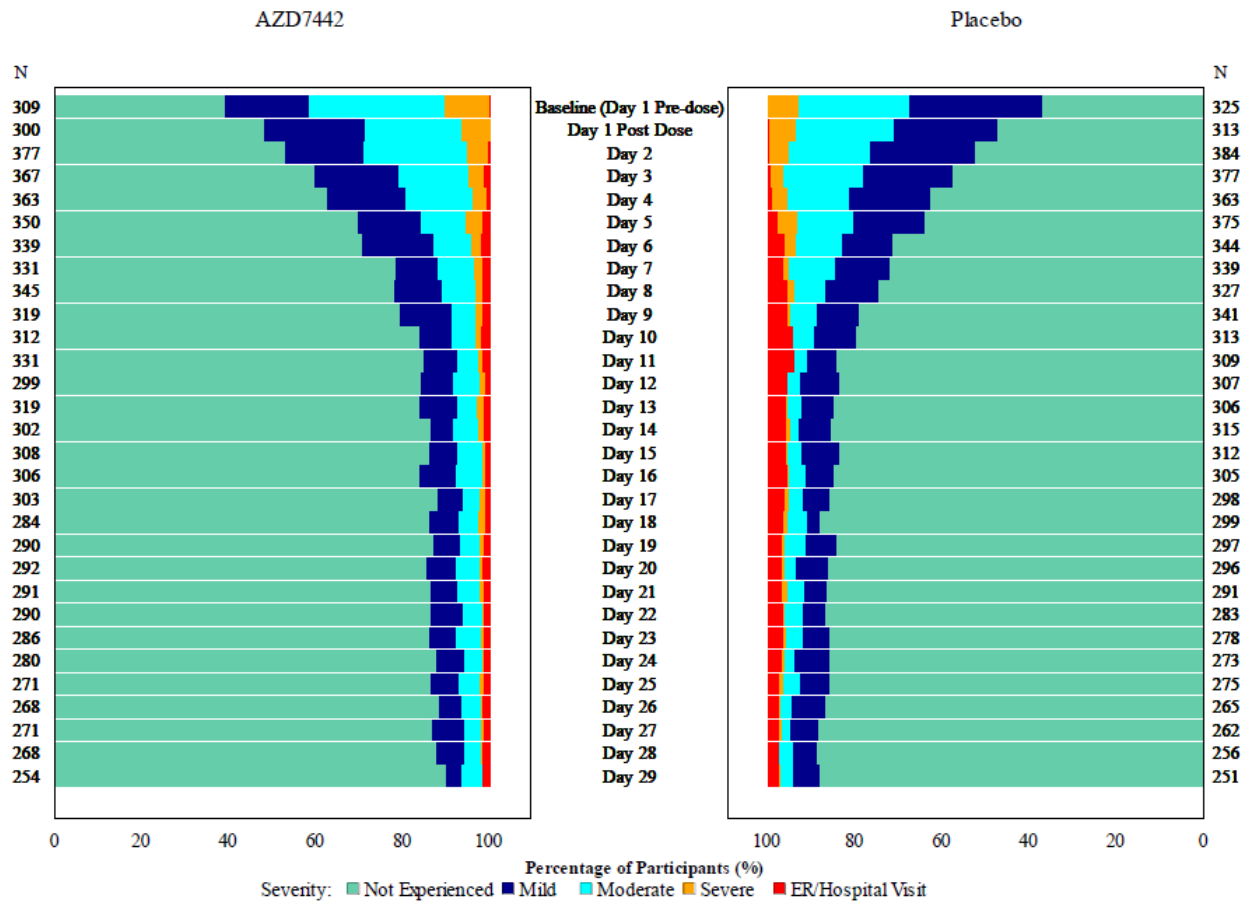

(c) Diarrhea

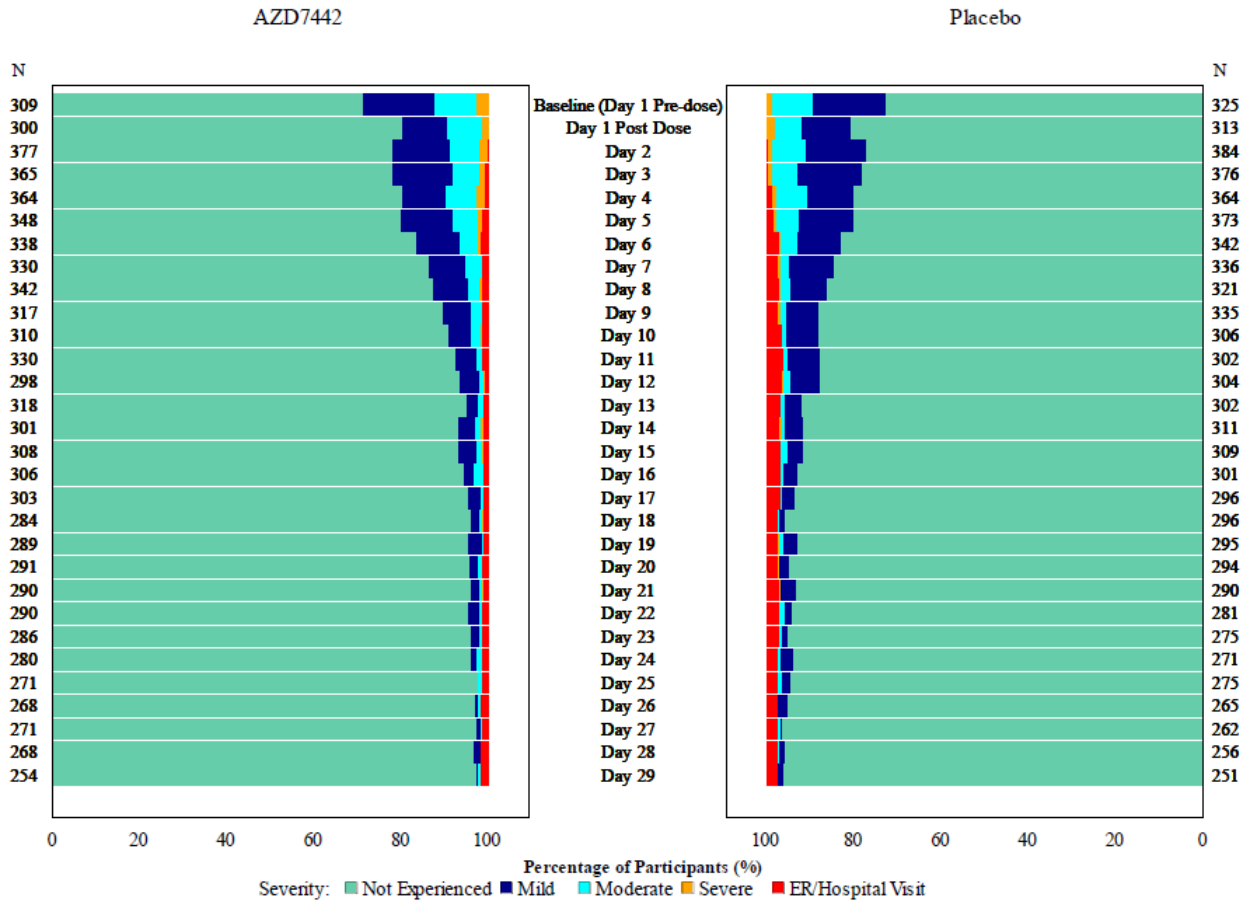



### (d) Fatigue

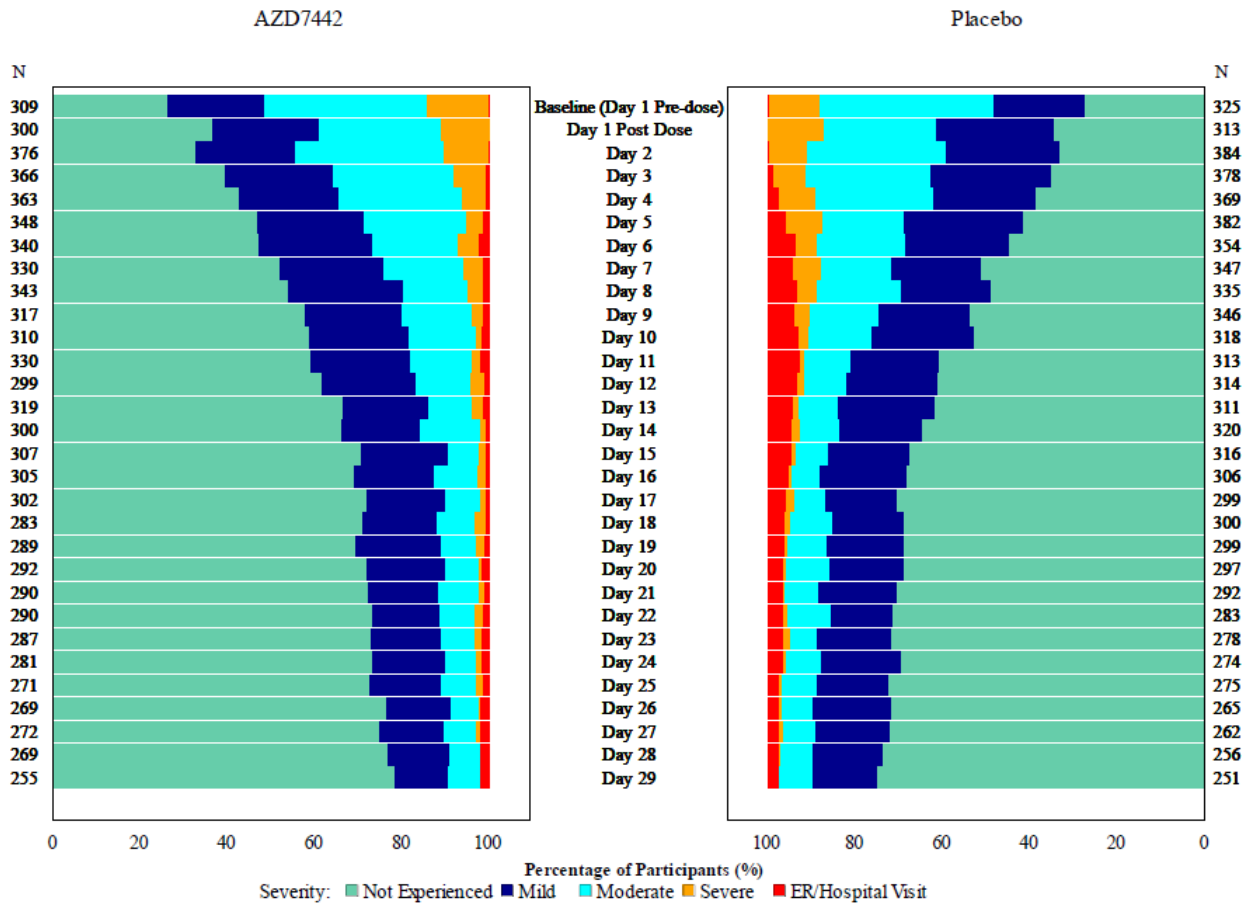

(e) Headache

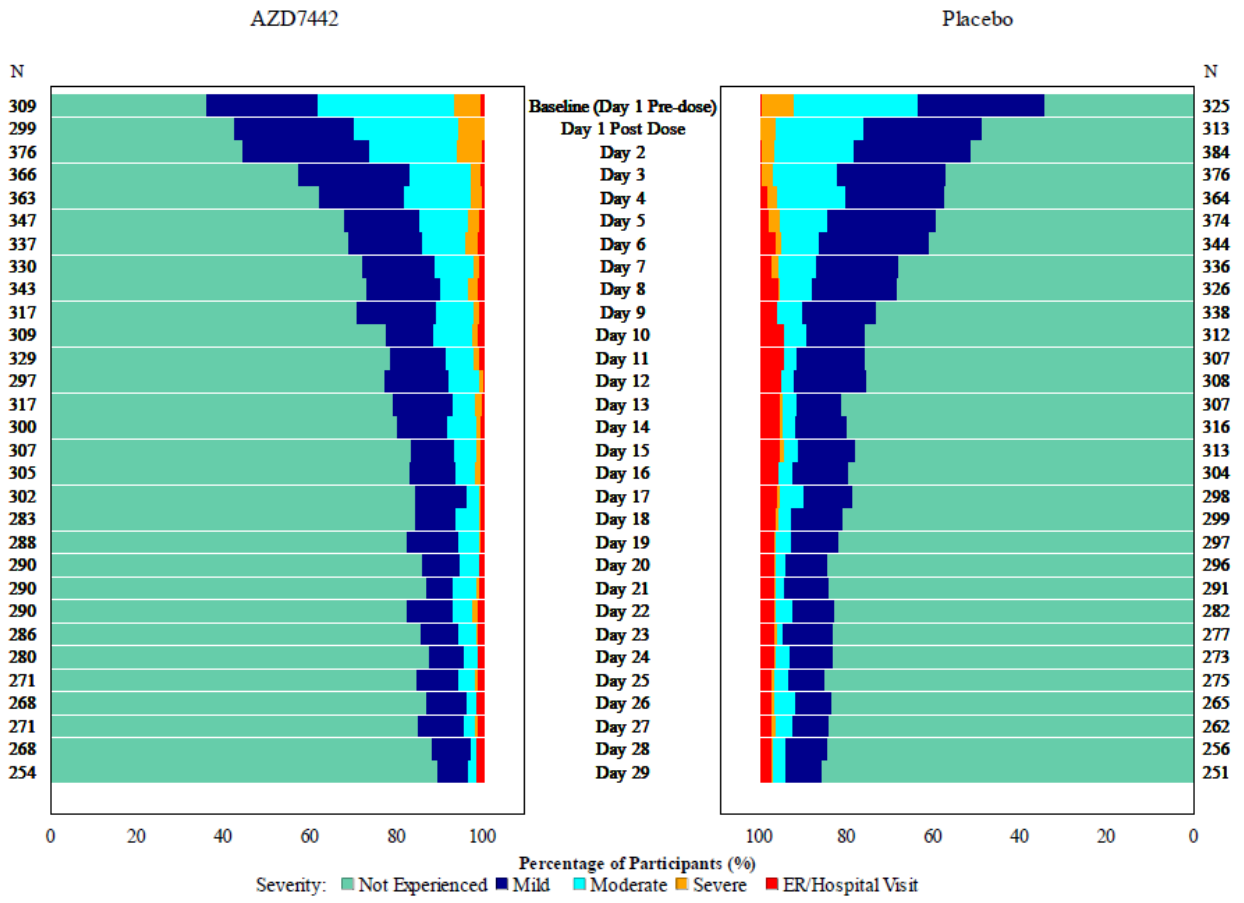

**(f) Nausea**

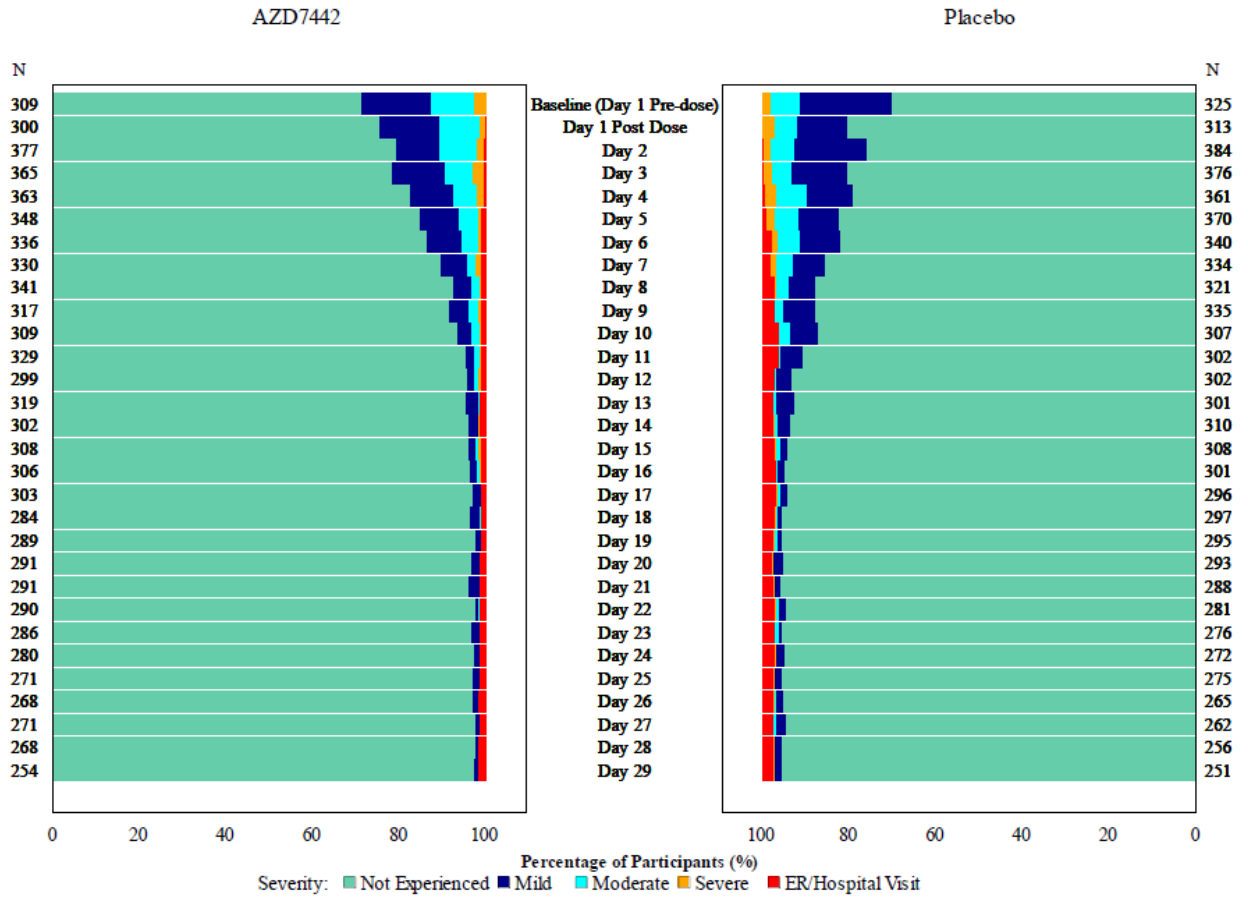

**(g) Runny nose**

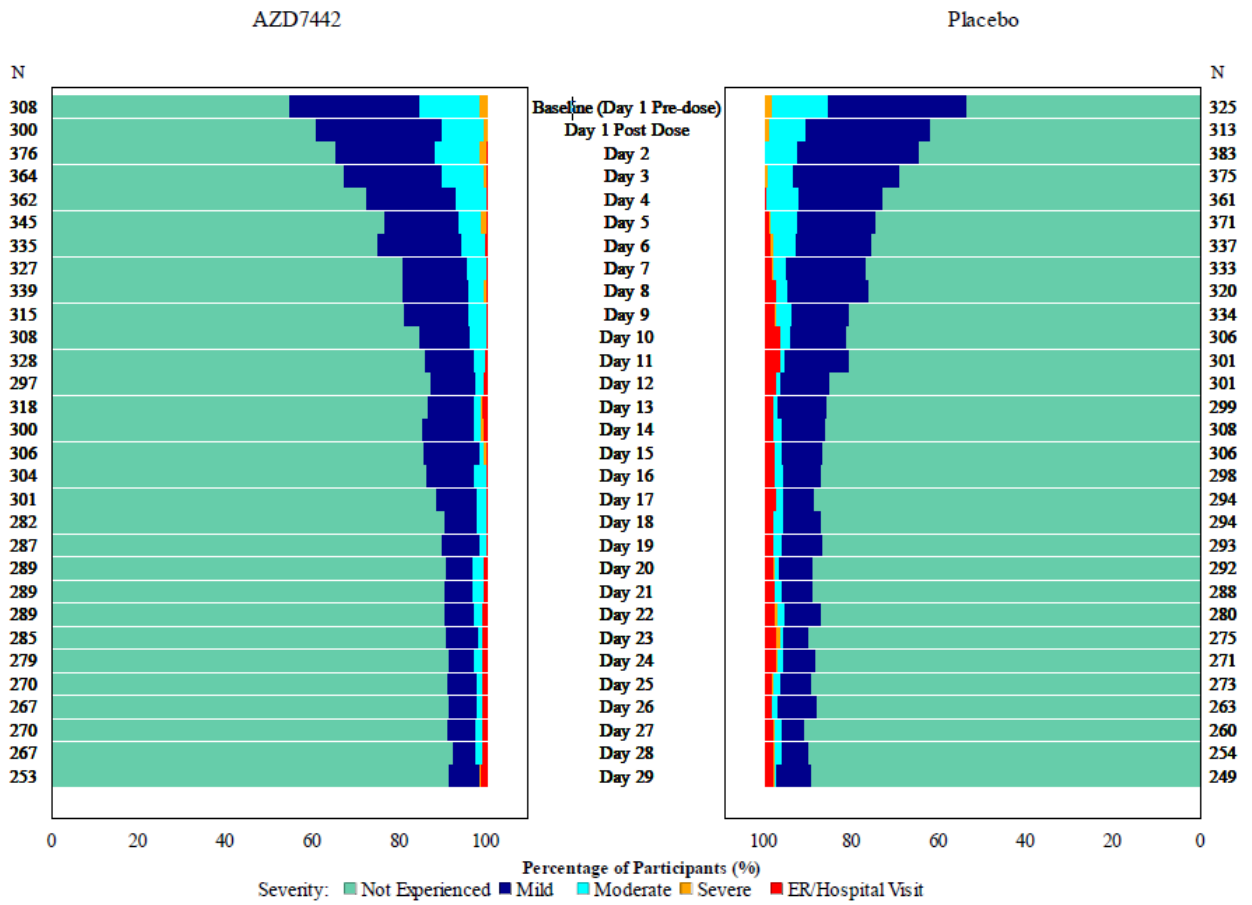

The mFAS comprised all participants in the FAS who received study drug  $\leq 7$  days from symptom onset and were not hospitalized at baseline (Day 1) for isolation purposes. The FAS comprised all randomized participants who received study drug.

ER emergency room, FAS full analysis set, mFAS modified FAS.

**Figure S3. Serum concentrations of AZD7442 over time (pharmacokinetic analysis set).**

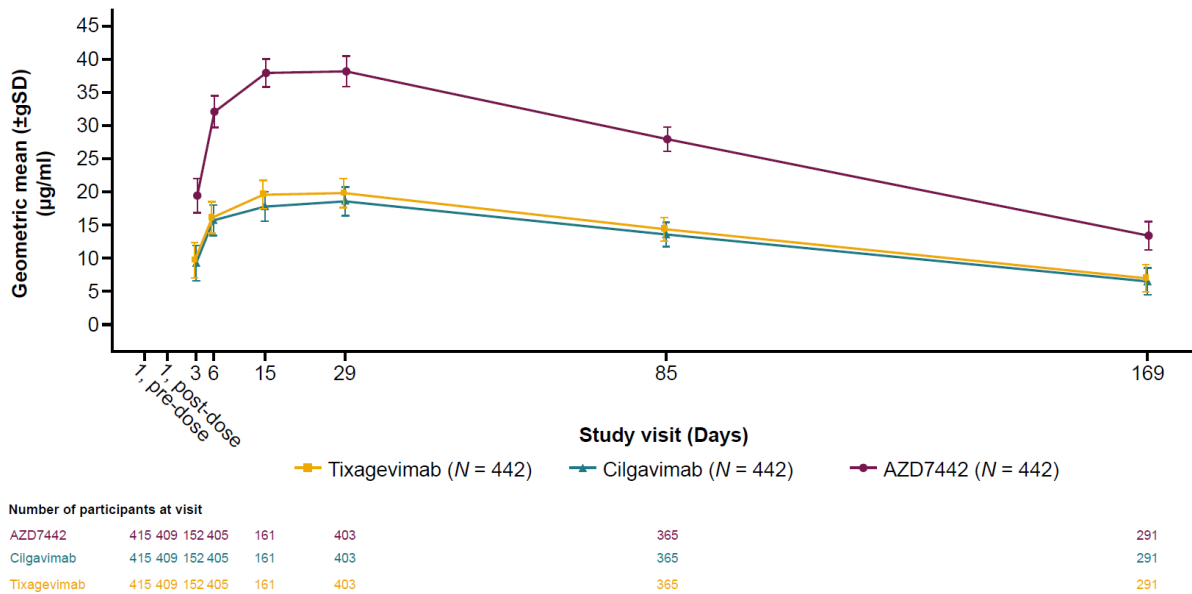

Includes participants from the pharmacokinetic analysis set, defined as all dosed participants for whom an adequate (measurable drug concentration) pharmacokinetic profile has been obtained.

Serum samples were analyzed for tixagevimab and cilgavimab concentrations by PPD<sup>®</sup> Laboratories (Richmond, VA, USA) using a validated ultra-high performance liquid chromatography method coupled with tandem mass spectrometry with positive electrospray. As previously described [1], 20-µl samples were diluted and extracted with streptavidin magnetic beads coated with biotinylated SARS-CoV-2 receptor binding domain. Isolated analytes were digested (denaturation, reduction, alkylation, and trypsin digestion) and the extract fortified with stable isotope-labeled peptide internal standard working solution. Unknown samples were quantified using a linear, 1/concentration<sup>2</sup> weighted, least-squares regression algorithm.

Pharmacokinetic analysis set comprised all participants who received AZD7442 with ≥ 1 quantifiable serum pharmacokinetic observation post-dose.

*gSD* geometric standard deviation, SARS-CoV-2 severe acute respiratory syndrome coronavirus 2.

---

## Reference

1. Loo YM, McTamney PM, Arends RH, et al. The SARS-CoV-2 monoclonal antibody combination, AZD7442, is protective in nonhuman primates and has an extended half-life in humans. *Sci Transl Med.* 2022;14(635):eabl8124.

**Table S1. List of study sites and IRB approvals**

| Country   | Centre no. | Name and address of IEC/IRB                                                                                               | Chairman of IEC/IRB | Date of Approval | Approval ID      |
|-----------|------------|---------------------------------------------------------------------------------------------------------------------------|---------------------|------------------|------------------|
| Argentina | 202        | CEI Centro de Investigaciones Médicas Mar del Plata<br>Av. Colón 3083 5th Floor, Mar del Plata, Buenos Aires, 7600        | Martin Donadio      | 25-Mar-21        | VV-TMF-005864214 |
| Argentina | 203        | Comité de Ética Independiente de la Clínica Privada Independencia,<br>Luis María Drago 5681,<br>Munro, Buenos Aires, 1605 | Marcelo Baggio      | 05-Apr-21        | VV-TMF-006058052 |
| Argentina | 205        | Comité Independiente de Ética Prof. Dr. Luis<br>J. E. Uriburu 774 1st floor,<br>Buenos Aires, Caba, C1027AAP              | Luis Zieher         | 10-Apr-21        | VV-TMF-005938003 |
| Argentina | 206        | Comité Independiente de Ética Prof. Dr. Luis                                                                              | Luis Zieher         | 20-Apr-21        | VV-TMF-005970977 |

|        |     |                                                                                                                                                                                                                                 |                                  |           |           |
|--------|-----|---------------------------------------------------------------------------------------------------------------------------------------------------------------------------------------------------------------------------------|----------------------------------|-----------|-----------|
|        |     | J. E. Uriburu 774 1st floor,<br>Buenos Aires, Caba,<br>C1027AAP                                                                                                                                                                 |                                  |           |           |
| Brazil | 702 | Comitê de Ética em Pesquisa do Hospital das Clínicas da Faculdade de Medicina de Ribeirão Preto da Universidade de São Paulo<br><br>Campus Universitário, SN, Prédio Central, Subsolo<br><br>Ribeirão Preto/SP<br><br>14048-900 | Dra. Mariana Guimarães Villanova | 29-Apr-21 | 4.679.639 |
| Brazil | 704 | Comitê de Ética em Pesquisa do Instituto de Saúde e Bem Estar da Mulher<br><br>Manoel da Nóbrega Street, 784<br><br>São Paulo/SP<br><br>04001-002                                                                               | Valdinéia Agnelo Pires da Silva  | 06-May-21 | 4.696.784 |



|        |     |                                                                                                                                                                                                             |                                              |           |           |
|--------|-----|-------------------------------------------------------------------------------------------------------------------------------------------------------------------------------------------------------------|----------------------------------------------|-----------|-----------|
| Brazil | 706 | <p>Comitê de Ética em Pesquisa INVESTIGA - Institutos de Pesquisa</p> <p>Dr. Romeu Tórtima Avenue, 739</p> <p>Campinas/SP</p> <p>13084-791</p>                                                              | Cristiana Madjarof                           | 12-May-21 | 4.707.118 |
| Brazil | 707 | <p>Comitê de Ética em Pesquisa em Seres Humanos CEPH da Fundação Universidade Regional de Blumenau</p> <p>Antonio da Veiga Street, 140 Bloco A 2<sup>nd</sup> Floor</p> <p>Blumenau/SC</p> <p>89030-903</p> | Professor Márcio Cristiano de Souza Rastelli | 12-May-21 | 4.707.536 |
| Brazil | 709 | <p>Comitê de Ética em Pesquisa do Hospital das Clínicas de Porto Alegre</p> <p>Ramiro Barcelos Street, 2350 Room 2229</p>                                                                                   | Têmis Maria Félix                            | 05-May-21 | 4.692.755 |

|                |               |                                                                                                                      |                                      |           |             |
|----------------|---------------|----------------------------------------------------------------------------------------------------------------------|--------------------------------------|-----------|-------------|
|                |               | Porto Alegre/RS<br>90035-903                                                                                         |                                      |           |             |
| Czech Republic | 1901          | Eticka komise Cesky<br>Tessin<br>Hrabinska 895/50,<br>Cesky Tesin,<br>737 01                                         | Mgr. Petr Papuga                     | 29-Mar-21 | 1/2021      |
| Czech Republic | Central: 1901 | <a href="#">Eticka komise Fakultni<br/>nemocnice Ostrava</a><br>17. listopadu 1790/5,<br>Ostrava – Poruba,<br>708 52 | Doc. MUDr. Karol Zelenik, Ph.D., MBA | 25-Mar-21 | 255/2021    |
| Czech Republic | 1902          | <a href="#">Eticka komise Oblastni<br/>nemocnice Kolin, a.s.</a><br>Zizkova 146,<br>Kolin<br>280 02                  | Martin Novacek                       | 26-Mar-21 | KO-016/2021 |
| Czech Republic | Central: 1902 | <a href="#">Eticka komise Fakultni<br/>nemocnice Ostrava</a>                                                         | Doc. MUDr. Karol Zelenik, Ph.D., MBA | 25-Mar-21 | 255/2021    |

|                |               |                                                                                                                                   |                                      |           |                     |
|----------------|---------------|-----------------------------------------------------------------------------------------------------------------------------------|--------------------------------------|-----------|---------------------|
|                |               | 17. listopadu 1790/5,<br>Ostrava – Poruba,<br>708 52                                                                              |                                      |           |                     |
| Czech Republic | 1903          | Eticka komise pro<br>Pardubickou a<br>Svitavskou nemocnici<br><br>Kyjevská 44,<br><br>Pardubice,<br><br>532 02                    | MUDr. David Stuchlik                 | 09-Apr-21 | 638/9.4.2021        |
| Czech Republic | Central: 1903 | <a href="#">Eticka komise Fakultni<br/>nemocnice Ostrava</a><br><br>17. listopadu 1790/5,<br><br>Ostrava – Poruba,<br><br>708 52  | Doc. MUDr. Karol Zelenik, Ph.D., MBA | 25-Mar-21 | 255/2021            |
| Germany        | 2602          | <a href="#">Ethikkommission (EC)<br/>der<br/>Landesärztekammer<br/>Hessen</a><br><br>Hanauer Landstraße<br>152,<br><br>Frankfurt, | Prof. Dr. med. Sebastian Harder      | 03-Feb-21 | Nr. 9545_AMG_M_2021 |

|         |      |                                                                                                                                                                  |                                                |           |                     |
|---------|------|------------------------------------------------------------------------------------------------------------------------------------------------------------------|------------------------------------------------|-----------|---------------------|
|         |      | 60314                                                                                                                                                            |                                                |           |                     |
| Germany | 2603 | <u>Ethikkommission der Landesärztekammer Rheinland-Pfalz,</u><br>Deutschhausplatz 3,<br>Mainz,<br>55116                                                          | Univ.-Prof. Dr. med. Dipl. Ing. Stephan Letzel | 03-Feb-21 | Nr. 9545_AMG_M_2021 |
| Germany | 2604 | <u>EC Landesamt für Gesundheit und Soziales (LAGeSo)</u><br>Geschäftsstelle der Ethik-Kommission des Landes Berlin,<br>Turmstraße 21, Haus A<br>Berlin,<br>10559 | Prof. Dr. med. K. Thomas Moesta                | 03-Feb-21 | Nr. 9545_AMG_M_2021 |
| Germany | 2605 | <u>EC Landesamt für Gesundheit und Soziales (LAGeSo)</u><br>Geschäftsstelle der Ethik-Kommission des Landes Berlin,<br>Turmstraße 21, Haus A                     | Prof. Dr. med. K. Thomas Moesta                | 01-Mar-21 | Nr. 9545_AMG_M_2021 |

|         |      |                                                                                                                                              |                                 |           |                     |
|---------|------|----------------------------------------------------------------------------------------------------------------------------------------------|---------------------------------|-----------|---------------------|
|         |      | Berlin,<br>10559                                                                                                                             |                                 |           |                     |
| Germany | 2606 | <u>Ethik-Kommission der Medizinischen Fakultät der LMU</u><br>Pettenkoferstr. 8a<br>München,<br>80336                                        | Prof. Dr. Wolfgang Eisenmenger  | 03-Feb-21 | Nr. 9545_AMG_M_2021 |
| Germany | 2607 | <u>Ethikkommission (EC) der Ärztekammer Nordrhein</u><br>Tersteegenstraße 9<br>Düsseldorf<br>40474                                           | Prof. Dr. Kurt Racké            | 03-Feb-21 | Nr. 9545_AMG_M_2021 |
| Germany | 2608 | <u>EC Landesamt für Gesundheit und Soziales (LAGeSo)</u><br>Geschäftsstelle der Ethik-Kommission des Landes Berlin,<br>Turmstraße 21, Haus A | Prof. Dr. med. K. Thomas Moesta | 03-Feb-21 | Nr. 9545_AMG_M_2021 |

|         |      |                                                                                              |                                                |           |                     |
|---------|------|----------------------------------------------------------------------------------------------|------------------------------------------------|-----------|---------------------|
|         |      | Berlin,<br>10559                                                                             |                                                |           |                     |
| Germany | 2609 | EC Ethik-Kommission<br>der Ärztekammer<br>Hamburg,<br>Weidestrasse 122b<br>Hamburg,<br>22083 | Prof. Dr. med. Rolf Stahl                      | 03-Feb-21 | Nr. 9545_AMG_M_2021 |
| Germany | 2610 | EC Bayerische<br>Landesaerztekammer<br>Muehlbaurstraße 16<br>München<br>81677                | Prof. Dr. med. Hasford                         | 01-Mar-21 | Nr. 9545_AMG_M_2021 |
| Germany | 2612 | Landesärztekammer<br>Rheinland-Pfalz EC<br>Deutschhausplatz 3<br>Mainz<br>55116              | Univ.-Prof. Dr. med. Dipl. Ing. Stephan Letzel | 22-Apr-21 | Nr. 9545_AMG_M_2021 |

|         |                      |                                                                                                                                                                                                                                        |                         |           |                   |
|---------|----------------------|----------------------------------------------------------------------------------------------------------------------------------------------------------------------------------------------------------------------------------------|-------------------------|-----------|-------------------|
| Hungary | Central:<br><br>3302 | Ethics Committee of Hungary – Central Egészségügyi Tudományos Tanács / Medical Research Council Klinikai Farmakológiai Etikai Bizottság/Ethics Committee for Clinical Pharmacology<br><br>Alkotmány u. 25.<br><br>Budapest<br><br>1054 | Prof. Dr. Bitter István | 01-Mar-21 | OGYEI/5496-8/2021 |
| Hungary | Central:<br><br>3305 | Ethics Committee of Hungary - Central Egészségügyi Tudományos Tanács / Medical Research Council Klinikai Farmakológiai Etikai Bizottság/Ethics Committee for Clinical Pharmacology<br><br>Budapest<br><br>1054                         | Prof. Dr. Bitter István | 01-Mar-21 | OGYEI/5496-8/2021 |
| Italy   | 4101                 | INMI 'L.Spallanzani' - IRCCS<br><br>Via Portuense 292                                                                                                                                                                                  | Cinzia Caporale         | 09-Feb-21 | VV-TMF-005801409  |

|       |      |                                                                                                                                      |                         |           |                              |
|-------|------|--------------------------------------------------------------------------------------------------------------------------------------|-------------------------|-----------|------------------------------|
|       |      | Roma, RM<br>149                                                                                                                      |                         |           |                              |
| Italy | 4102 | Comitato Etico<br>dell'Ospedale San<br>Raffaele<br><br>Via Olgettina 60<br><br>Milano<br><br>20132                                   | Elisabetta Riva         | 25-Feb-21 | VV-TMF-005845206             |
| Italy | 4104 | Comitato Etico<br>Dell'Area Vasta Emilia<br>Nord – Sede di Reggio<br>Emilia<br><br>Viale Umberto I<br><br>Reggio Emilia<br><br>43123 | Roberto Giuseppe Grilli | 02-Mar-21 | NA (receipt of CEC approval) |
| Italy | 4105 | Comitato Etico<br>Dell'Area Vasta Emilia<br>Nord – Sede di<br>Piacenza<br><br>Via Giuseppe Taverna<br>49<br><br>Piacenza             | Roberto Giuseppe Grilli | 02-Mar-21 | NA (receipt of CEC approval) |



|       |      |                                                                                                                                                                                     |                   |           |                              |
|-------|------|-------------------------------------------------------------------------------------------------------------------------------------------------------------------------------------|-------------------|-----------|------------------------------|
|       |      | 29100                                                                                                                                                                               |                   |           |                              |
| Italy | 4108 | Azienda Ospedaliero –<br>Universitaria Pisana<br><br>via A. Cocchi, 7/9<br><br>Pisa<br><br>56121                                                                                    | Romano Danesi     | 25-Feb-21 | NA (receipt of CEC approval) |
| Japan | 4301 | Institutional Review<br>Board of Tohoku<br>Medical and<br>Pharmaceutical<br>University Hospital 1-<br>12-1 Fukumuro,<br>Miyagino-ku<br><br>Sendai-shi<br><br>Miyagi<br><br>983-8512 | Kazuhiro Murakami | 08-Mar-21 | NA                           |
| Japan | 4303 | Maebashi Red Cross<br>Hospital Institutional<br>Review Board 389-1<br>Asakura-machi<br><br>Maebashi-Shi                                                                             | Yutaka Uehara     | 22-Feb-21 | NA                           |

|       |      |                                                                                                                                                                |                   |           |    |
|-------|------|----------------------------------------------------------------------------------------------------------------------------------------------------------------|-------------------|-----------|----|
|       |      | Gunma<br>371-0811                                                                                                                                              |                   |           |    |
| Japan | 4304 | Saitama Medical<br>University Hospital<br>Institutional Review<br>Board<br><br>38 Morohongo<br>Moroyama-machi<br><br>Iruma-Gun Saitama-<br>Ken<br><br>350-0495 | Keiji Yamamoto    | 02-Mar-21 | NA |
| Japan | 4305 | Showa University<br>Hospital Institutional<br>Review Board<br><br>1-5-8, Hatanodai<br><br>Shinagawa-ku<br><br>Tokyo<br><br>142-8666                            | Takaaki Matsuyama | 08-Mar-21 | NA |
| Japan | 4306 | Tokyo Medical<br>University Hachioji<br>Medical Center<br>Institutional Review<br>Board                                                                        | Hiroyuki Jimbo    | 25-Mar-21 | NA |

|       |      |                                                                                                                                                               |                  |           |    |
|-------|------|---------------------------------------------------------------------------------------------------------------------------------------------------------------|------------------|-----------|----|
|       |      | 1163, Tatemachi<br>Hachioji-shi<br>Tokyo<br>193-0998                                                                                                          |                  |           |    |
| Japan | 4307 | Institutional Review Board of International University of Health and Welfare<br>1-24-1 Minami-Aoyama<br>Amity Nogizaka Bldg.<br>Minato-ku , Tokyo<br>107-0062 | Tsutomu Yamazaki | 25-Feb-21 | NA |
| Japan | 4308 | Center Hospital of the National Center for Global Health and Medicine IRB<br>1-21-1 Toyama<br>Shinjuku-ku Tokyo<br>162-8655                                   | Takeshi Tamaki   | 03-Mar-21 | NA |
| Japan | 4309 | Chiba Aoba Municipal Hospital Institutional Review Board                                                                                                      | Tomoyuki Rokkaku | 24-Feb-21 | NA |

|       |      |                                                                                                                         |                  |           |    |
|-------|------|-------------------------------------------------------------------------------------------------------------------------|------------------|-----------|----|
|       |      | 1273-2, Aobacho<br>Chuo-ku Chiba-shi,<br>Chiba<br>260-0852                                                              |                  |           |    |
| Japan | 4310 | Institutional Review Board of Tokyo<br>Shinagawa Hospital 6-3<br>22 Higashioi<br>Shinagawa-ku, Tokyo<br>140-8522        | Masaharu Shinkai | 24-Feb-21 | NA |
| Japan | 4312 | Rakuwakai Otowa Hospital Institutional Review Board<br>2 Otowachinji-cho<br>Yamashina-ku Kyoto-shi<br>Kyoto<br>607-8062 | Yuko Wada        | 18-Feb-21 | NA |

|        |                  |                                                                                                                                                                |                                                                                                                          |           |            |
|--------|------------------|----------------------------------------------------------------------------------------------------------------------------------------------------------------|--------------------------------------------------------------------------------------------------------------------------|-----------|------------|
| Mexico | Central:<br>4901 | Comité de Etica en Investigación del Instituto Jalisciense de Investigación Clínica Penitenciaria #20<br><br>Colonia Centro, Guadalajara, Jalisco<br><br>44100 | Mtra. Bertha Alicia Ochoa Sanchez<br><br>Dr. Liliana Faviola de la Cerda Trujillo<br><br>Dr. Luis Enrique Colunga Lozano | 06-Jan-21 | CEI-000001 |
| Mexico | Central:<br>4902 | Comité de Etica en Investigación del Instituto Jalisciense de Investigación Clínica Penitenciaria #20<br><br>Colonia Centro, Guadalajara, Jalisco<br><br>44100 | Mtra. Bertha Alicia Ochoa Sanchez<br><br>Dr. Liliana Faviola de la Cerda Trujillo<br><br>Dr. Luis Enrique Colunga Lozano | 06-Jan-21 | CEI-000001 |
| Mexico | Central:<br>4903 | Comité de Etica en Investigación del Instituto Jalisciense de Investigación Clínica Penitenciaria #20<br><br>Colonia Centro, Guadalajara, Jalisco<br><br>44100 | Mtra. Bertha Alicia Ochoa Sanchez<br><br>Dr. Liliana Faviola de la Cerda Trujillo<br><br>Dr. Luis Enrique Colunga Lozano | 06-Jan-21 | CEI-000001 |

|        |                      |                                                                                                                                                                         |                                                                                                                          |           |                |
|--------|----------------------|-------------------------------------------------------------------------------------------------------------------------------------------------------------------------|--------------------------------------------------------------------------------------------------------------------------|-----------|----------------|
| Mexico | Central:<br><br>4904 | Comité de Etica en Investigación del Instituto Jalisciense de Investigación Clínica Penitenciaria #20<br><br>Colonia Centro, Guadalajara, Jalisco<br><br>44100          | Mtra. Bertha Alicia Ochoa Sanchez<br><br>Dr. Liliana Faviola de la Cerda Trujillo<br><br>Dr. Luis Enrique Colunga Lozano | 06-Jan-21 | CEI-000001     |
| Mexico | 4905                 | Comité de Etica en Investigación de Médica Sur S.A.B de C.V<br><br>Puente de Piedra No. 150<br><br>Colonia Toriello Guerra Tlalpan<br><br>Ciudad de México<br><br>14050 | Dr. Norberto Carlos Chávez Tapia<br><br>Dra. Varenka Julieta Barbero Becerra<br><br>Dra. Eva Juarez Hernandez            | 18-Jan-21 | 01-2021-CEI-30 |
| Mexico | 4906                 | Comité de Etica en Investigación del Hospital Universitario "Dr. José Eleuterio González"<br><br>Francisco Ignacio Madero y Avenida Gonzalitos S/N                      | José Gerardo Garza Leal<br><br>Dr. C. Guillermo Elizondo Riojas                                                          | 07-Jan-21 | PI21-00005     |

|        |                  |                                                                                                                                                                                                                                              |                                                                                                                                 |           |                   |
|--------|------------------|----------------------------------------------------------------------------------------------------------------------------------------------------------------------------------------------------------------------------------------------|---------------------------------------------------------------------------------------------------------------------------------|-----------|-------------------|
|        |                  | <p>Colonia Mitras Centro<br/>Monterrey , Nuevo<br/>León</p> <p>64460</p>                                                                                                                                                                     | <p>Dr. Mario Alberto Campos Coy</p>                                                                                             |           |                   |
| Mexico | 4907             | <p>Comité de Etica en<br/>Investigación del<br/>Instituto Nacional de<br/>Enfermedades<br/>Respiratorias Ismael<br/>Cosío Villegas Calzada<br/>de Tlalpan #4502<br/>Colonia Sección XVI<br/>Tlalpan</p> <p>Ciudad de México</p> <p>14080</p> | <p>Lic. Adriana Espinosa Jove</p> <p>Dra. en C. Blanca Margarita Bazán Perkins</p> <p>Dr. Edgar Enrique Sevilla Reyes</p>       | 05-Jan-21 | INER/CEI/083/2021 |
| Mexico | Central:<br>4908 | <p>Comité de Etica en<br/>Investigación del<br/>Instituto Jalisciense de<br/>Investigación Clínica</p> <p>Penitenciaria #20</p> <p>Colonia Centro,<br/>Guadalajara, Jalisco</p> <p>44100</p>                                                 | <p>Mtra. Bertha Alicia Ochoa Sanchez</p> <p>Dr. Liliana Faviola de la Cerda Trujillo</p> <p>Dr. Luis Enrique Colunga Lozano</p> | 06-Jan-21 | CEI-000001        |
| Mexico | Central:         | <p>Comité de Etica en<br/>Investigación del<br/>Instituto Jalisciense de<br/>Investigación Clínica</p>                                                                                                                                       | <p>Mtra. Bertha Alicia Ochoa Sanchez</p>                                                                                        | 06-Jan-21 | CEI-000001        |

|        |                  |                                                                                                                                                                       |                                                                                                                  |           |                           |
|--------|------------------|-----------------------------------------------------------------------------------------------------------------------------------------------------------------------|------------------------------------------------------------------------------------------------------------------|-----------|---------------------------|
|        | 4909             | Penitenciaria #20<br>Colonia Centro,<br>Guadalajara, Jalisco<br>44100                                                                                                 | Dr. Liliana Faviola de la Cerda Trujillo<br>Dr. Luis Enrique Colunga Lozano                                      |           |                           |
| Mexico | Central:<br>4910 | Comité de Etica en<br>Investigación del<br>Instituto Jalisciense de<br>Investigación Clínica<br>Penitenciaria #20<br>Colonia Centro,<br>Guadalajara, Jalisco<br>44100 | Mtra. Bertha Alicia Ochoa Sanchez<br>Dr. Liliana Faviola de la Cerda Trujillo<br>Dr. Luis Enrique Colunga Lozano | 06-Jan-21 | CEI-000001                |
| Mexico | Central:<br>4911 | Comité de Etica en<br>Investigación del<br>Instituto Jalisciense de<br>Investigación Clínica<br>Penitenciaria #20<br>Colonia Centro,<br>Guadalajara, Jalisco<br>44100 | Mtra. Bertha Alicia Ochoa Sanchez<br>Dr. Liliana Faviola de la Cerda Trujillo<br>Dr. Luis Enrique Colunga Lozano | 06-Jan-21 | CEI-000001                |
| Poland | Central:         | Komisja Bioetyczna<br>przy Dolnoslaskiej Izbie<br>Lekarskiej Kazimierza<br>Wielkiego 45                                                                               | Dr n. med. Włodzimierz Bednorz                                                                                   | 08-Apr-21 | Resolution no. 22/04/2021 |



|                    |                  |                                                                                                                                               |                                |           |                           |
|--------------------|------------------|-----------------------------------------------------------------------------------------------------------------------------------------------|--------------------------------|-----------|---------------------------|
|                    | 5704             | Wroclaw<br>50-077                                                                                                                             |                                |           |                           |
| Poland             | Central:<br>5706 | Komisja Bioetyczna<br>przy Dolnoslaskiej Izbie<br>Lekarskiej Kazimierza<br>Wielkiego 45<br>Wroclaw<br>50-077                                  | Dr n. med. Włodzimierz Bednorz | 08-Apr-21 | Resolution no. 22/04/2021 |
| Russian Federation | 6201             | LEC of "Medical<br>Research Institute"<br>Legal:<br>25A Koli Tomchaka Str.<br>Location:148D<br>Moskovsky prosp.<br>Saint Petersburg<br>196084 | Yuhno Mihail                   | 24-Feb-21 | VV-TMF-005749760          |
| Russian Federation | 6202             | St. Pt. State Institution<br>of Health "City<br>polyclinic No 109,<br>Oleko Dundicha Street,<br>8 building 2<br>Saint-Petersburg<br>192283    | Zhagrin Valeri                 | 24-Feb-21 | VV-TMF-005749962          |

|                    |      |                                                                                                                                      |                    |           |                  |
|--------------------|------|--------------------------------------------------------------------------------------------------------------------------------------|--------------------|-----------|------------------|
| Russian Federation | 6205 | Independent Ethics Committee at Joint-Stock Company "Group of Companies Medsi" 16, Krasnaya Presnya str.<br><br>Moscow<br><br>123242 | Igor Abramov       | 05-Mar-21 | VV-TMF-005842991 |
| Russian Federation | 6206 | Ethics committee, Pokrovskiy Hosp<br><br>85, Bolshoy prospect V.O.<br><br>St.-Petersburg<br><br>199106                               | Balyabin Aleksandr | 24-Feb-21 | VV-TMF-005791088 |
| Russian Federation | 6208 | IEC of LLC Clinic OsNova<br><br>Serebristiy boulevard, 20<br><br>Saint-Petersburg<br><br>197227                                      | Daria Adiatullina  | 01-Apr-21 | VV-TMF-005969985 |
| Russian Federation | 6209 | IEC Bayandin Murmansk Regional Clinical Hospital                                                                                     | Viktoria Dolinina  | 09-Mar-21 | VV-TMF-005793049 |

|                    |               |                                                                                                                                                   |                              |             |                                    |
|--------------------|---------------|---------------------------------------------------------------------------------------------------------------------------------------------------|------------------------------|-------------|------------------------------------|
|                    |               | 6 Pavlova ul.<br>Murmansk<br>183047                                                                                                               |                              |             |                                    |
| Russian Federation | 6210          | LEC of Ltd "Astarta"<br>Nakhimova Street, 11<br>Saint-Petersburg<br>199226                                                                        | Stroyev Yuri                 | 01-Mar-21   | VV-TMF-005796218                   |
| Spain              | Central: 7001 | CEIM Provincial de Malaga Ethic<br>Comitee Provincial de Málaga Ethic<br>Comitee Provincial de Málaga<br>Avda. Carlos Haya s/n<br>Malaga<br>29010 | Dr. Manuel Herrera Gutiérrez | 12 Apr 2021 | NA: There is no approval ID itself |
| Spain              | Central: 7003 | CEIM Provincial de Malaga Ethic<br>Comitee Provincial de Málaga Ethic<br>Comitee Provincial de Málaga<br>Avda. Carlos Haya s/n<br>Malaga          | Dr. Manuel Herrera Gutiérrez | 12 Apr 2021 | NA: There is no approval ID itself |

|         |               |                                                                                                                                                               |                              |             |                                    |
|---------|---------------|---------------------------------------------------------------------------------------------------------------------------------------------------------------|------------------------------|-------------|------------------------------------|
|         |               | 29010                                                                                                                                                         |                              |             |                                    |
| Spain   | Central: 7004 | CEIM Provincial de Malaga Ethic<br>Comitee Provincial de Málaga Ethic<br>Comitee Provincial de Málaga<br><br>Avda. Carlos Haya s/n<br><br>Malaga<br><br>29010 | Dr. Manuel Herrera Gutiérrez | 12 Apr 2021 | NA: There is no approval ID itself |
| Ukraine | 7705          | EC of "Central city clinical hospital of Ivano-Frankivsk city council"114, Mazepy str.<br><br>Ivano-Frankivsk<br><br>78018                                    | O.V. Tsikhon                 | 18-May-21   | Nr 59                              |
| Ukraine | 7706          | EC of Communal Non-profit Enterprise 'Kherson City Clinical Hospital n.a. Ye.Ye. Karabelesh'22/1, Ushakova Str.<br><br>Kherson,<br><br>73000                  | O. I. Demediuk               | 13-May-21   | Nr 10-СП                           |

|                |                  |                                                                                                          |                          |           |                                                 |
|----------------|------------------|----------------------------------------------------------------------------------------------------------|--------------------------|-----------|-------------------------------------------------|
| Ukraine        | 7707             | EC of ME Dnipro<br>Multifield Clinical<br>Hospital #4, 31,<br>Blyzhnya street<br><br>Dnipro<br><br>49102 | M.D. Shynkarenko         | 13-May-21 | Nr 11                                           |
| United Kingdom | Central:<br>2804 | The Old Chapel<br><br>Royal Standard Place,<br>Nottingham<br><br>NG1 6FS                                 | Professor Catherine Urch | 06-Jan-21 | REC Ref: 20/HRA/5769<br>IRAS Project ID: 291930 |
| United Kingdom | Central:<br>2816 | The Old Chapel<br><br>Royal Standard Place,<br>Nottingham<br><br>NG1 6FS                                 | Professor Catherine Urch | 06-Jan-21 | REC Ref: 20/HRA/5769<br>IRAS Project ID: 291930 |
| United Kingdom | Central:<br>2817 | The Old Chapel<br><br>Royal Standard Place,<br>Nottingham<br><br>NG1 6FS                                 | Professor Catherine Urch | 06-Jan-21 | REC Ref: 20/HRA/5769<br>IRAS Project ID: 291930 |
| United Kingdom | Central:         | The Old Chapel                                                                                           | Professor Catherine Urch | 06-Jan-21 |                                                 |

|                             |                      |                                                                              |                                                        |           |                                                 |
|-----------------------------|----------------------|------------------------------------------------------------------------------|--------------------------------------------------------|-----------|-------------------------------------------------|
|                             | 2819                 | Royal Standard Place,<br>Nottingham<br><br>NG1 6FS                           |                                                        |           | REC Ref: 20/HRA/5769<br>IRAS Project ID: 291930 |
| United Kingdom              | Central:<br><br>2821 | The Old Chapel<br><br>Royal Standard Place,<br>Nottingham<br><br>NG1 6FS     | Professor Catherine Urch                               | 06-Jan-21 | REC Ref: 20/HRA/5769<br>IRAS Project ID: 291930 |
| United Kingdom              | Central:<br><br>2823 | The Old Chapel<br><br>Royal Standard Place,<br>Nottingham<br><br>NG1 6FS     | Professor Catherine Urch                               | 06-Jan-21 | REC Ref: 20/HRA/5769<br>IRAS Project ID: 291930 |
| United States of<br>America | Central:<br><br>7801 | Advarra<br><br>6100 Merriweather Dr.,<br>Suite 600<br><br>Columbia, MD 21044 | Susan Ebert, MS, CIP<br><br>Luke Gelinas, PhD, MAR, AB | 07-Jan-21 | NA                                              |
| United States of<br>America | Central:<br><br>7802 | Advarra<br><br>6100 Merriweather Dr.,<br>Suite 600<br><br>Columbia, MD 21044 | Susan Ebert, MS, CIP<br>Luke Gelinas, PhD,<br>MAR, AB  | 07-Jan-21 | NA                                              |

|                          |                  |                                                                          |                                                    |           |    |
|--------------------------|------------------|--------------------------------------------------------------------------|----------------------------------------------------|-----------|----|
| United States of America | Central:<br>7805 | Advarra<br>6100 Merriweather Dr.,<br>Suite 600<br><br>Columbia, MD 21044 | Susan Ebert, MS, CIP Luke Gelinas, PhD,<br>MAR, AB | 07-Jan-21 | NA |
| United States of America | Central:<br>7806 | Advarra<br>6100 Merriweather Dr.,<br>Suite 600<br><br>Columbia, MD 21044 | Susan Ebert, MS, CIP Luke Gelinas, PhD,<br>MAR, AB | 07-Jan-21 | NA |
| United States of America | Central:<br>7807 | Advarra<br>6100 Merriweather Dr.,<br>Suite 600<br><br>Columbia, MD 21044 | Susan Ebert, MS, CIP Luke Gelinas, PhD,<br>MAR, AB | 07-Jan-21 | NA |
| United States of America | Central:<br>7810 | Advarra<br>6100 Merriweather Dr.,<br>Suite 600<br><br>Columbia, MD 21044 | Susan Ebert, MS, CIP Luke Gelinas, PhD,<br>MAR, AB | 07-Jan-21 | NA |
| United States of America | Central:<br>7811 | Advarra<br>6100 Merriweather Dr.,<br>Suite 600<br><br>Columbia, MD 21044 | Susan Ebert, MS, CIP Luke Gelinas, PhD,<br>MAR, AB | 07-Jan-21 | NA |

|                          |                  |                                                                          |                                                    |           |    |
|--------------------------|------------------|--------------------------------------------------------------------------|----------------------------------------------------|-----------|----|
| United States of America | Central:<br>7812 | Advarra<br>6100 Merriweather Dr.,<br>Suite 600<br><br>Columbia, MD 21044 | Susan Ebert, MS, CIP Luke Gelinas, PhD,<br>MAR, AB | 07-Jan-21 | NA |
| United States of America | Central:<br>7814 | Advarra<br>6100 Merriweather Dr.,<br>Suite 600<br><br>Columbia, MD 21044 | Susan Ebert, MS, CIP Luke Gelinas, PhD,<br>MAR, AB | 07-Jan-21 | NA |
| United States of America | Central:<br>7815 | Advarra<br>6100 Merriweather Dr.,<br>Suite 600<br><br>Columbia, MD 21044 | Susan Ebert, MS, CIP Luke Gelinas, PhD,<br>MAR, AB | 07-Jan-21 | NA |
| United States of America | Central:<br>7816 | Advarra<br>6100 Merriweather Dr.,<br>Suite 600<br><br>Columbia, MD 21044 | Susan Ebert, MS, CIP Luke Gelinas, PhD,<br>MAR, AB | 07-Jan-21 | NA |
| United States of America | Central:<br>7818 | Advarra<br>6100 Merriweather Dr.,<br>Suite 600<br><br>Columbia, MD 21044 | Susan Ebert, MS, CIP Luke Gelinas, PhD,<br>MAR, AB | 07-Jan-21 | NA |



|                          |                  |                                                                          |                                                    |           |    |
|--------------------------|------------------|--------------------------------------------------------------------------|----------------------------------------------------|-----------|----|
| United States of America | Central:<br>7821 | Advarra<br>6100 Merriweather Dr.,<br>Suite 600<br><br>Columbia, MD 21044 | Susan Ebert, MS, CIP Luke Gelinas, PhD,<br>MAR, AB | 07-Jan-21 | NA |
| United States of America | Central:<br>7825 | Advarra<br>6100 Merriweather Dr.,<br>Suite 600<br><br>Columbia, MD 21044 | Susan Ebert, MS, CIP Luke Gelinas, PhD,<br>MAR, AB | 07-Jan-21 | NA |
| United States of America | Central:<br>7826 | Advarra<br>6100 Merriweather Dr.,<br>Suite 600<br><br>Columbia, MD 21044 | Susan Ebert, MS, CIP Luke Gelinas, PhD,<br>MAR, AB | 07-Jan-21 | NA |
| United States of America | Central:<br>7827 | Advarra<br>6100 Merriweather Dr.,<br>Suite 600<br><br>Columbia, MD 21044 | Susan Ebert, MS, CIP Luke Gelinas, PhD,<br>MAR, AB | 07-Jan-21 | NA |
| United States of America | Central:<br>7829 | Advarra<br>6100 Merriweather Dr.,<br>Suite 600<br><br>Columbia, MD 21044 | Susan Ebert, MS, CIP Luke Gelinas, PhD,<br>MAR, AB | 07-Jan-21 | NA |

|                          |                  |                                                                          |                                                    |           |    |
|--------------------------|------------------|--------------------------------------------------------------------------|----------------------------------------------------|-----------|----|
| United States of America | Central:<br>7831 | Advarra<br>6100 Merriweather Dr.,<br>Suite 600<br><br>Columbia, MD 21044 | Susan Ebert, MS, CIP Luke Gelinas, PhD,<br>MAR, AB | 07-Jan-21 | NA |
| United States of America | Central:<br>7833 | Advarra<br>6100 Merriweather Dr.,<br>Suite 600<br><br>Columbia, MD 21044 | Susan Ebert, MS, CIP Luke Gelinas, PhD,<br>MAR, AB | 07-Jan-21 | NA |
| United States of America | Central:<br>7834 | Advarra<br>6100 Merriweather Dr.,<br>Suite 600<br><br>Columbia, MD 21044 | Susan Ebert, MS, CIP Luke Gelinas, PhD,<br>MAR, AB | 07-Jan-21 | NA |
| United States of America | Central:<br>7835 | Advarra<br>6100 Merriweather Dr.,<br>Suite 600<br><br>Columbia, MD 21044 | Susan Ebert, MS, CIP Luke Gelinas, PhD,<br>MAR, AB | 07-Jan-21 | NA |
| United States of America | Central:<br>7836 | Advarra<br>6100 Merriweather Dr.,<br>Suite 600<br><br>Columbia, MD 21044 | Susan Ebert, MS, CIP Luke Gelinas, PhD,<br>MAR, AB | 07-Jan-21 | NA |

|                          |                  |                                                                      |                                                    |           |    |
|--------------------------|------------------|----------------------------------------------------------------------|----------------------------------------------------|-----------|----|
| United States of America | Central:<br>7837 | Advarra<br>6100 Merriweather Dr.,<br>Suite 600<br>Columbia, MD 21044 | Susan Ebert, MS, CIP Luke Gelinas, PhD,<br>MAR, AB | 07-Jan-21 | NA |
| United States of America | Central:<br>7838 | Advarra<br>6100 Merriweather Dr.,<br>Suite 600<br>Columbia, MD 21044 | Susan Ebert, MS, CIP Luke Gelinas, PhD,<br>MAR, AB | 07-Jan-21 | NA |

*IEC* independent ethics committees, *IRB* institutional review board.
